# Supplementary material for: Altered hepatic lipid metabolism in mice lacking both the melanocortin type 4 receptor and low density lipoprotein receptor
Source: PLOS journal article supplement (doi:10.1371/journal.pone.0172000), 2017-02-16
Supplement: S3 (10.1371/journal.pone.0172000.s003) [file journal.pone.0172000.s003]

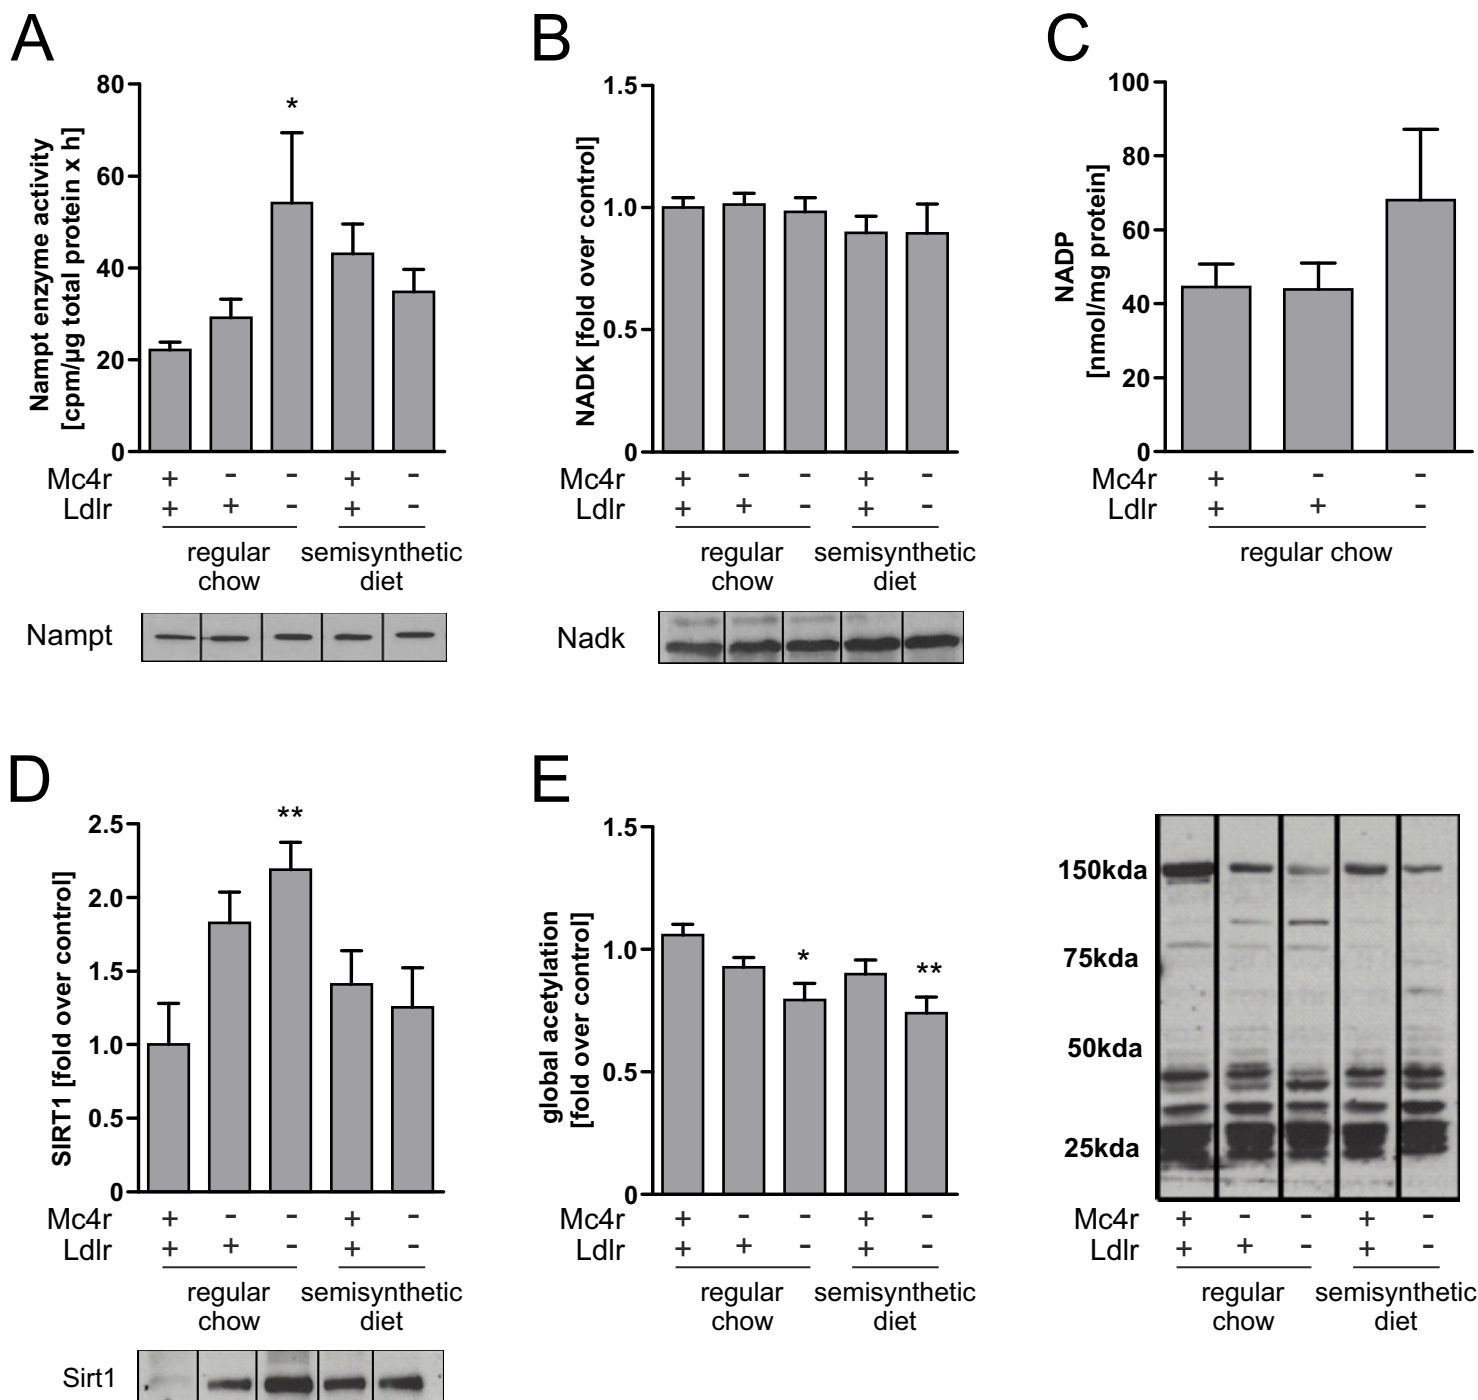

**S3 Fig. Changes in components of the NAD metabolism in wild-type and genetically modified mice (A)** NAMPT protein expression and activity was determined in a Western blot and functional assay (see S1 Methods). In Western blots GAPDH expression served as control (n = 3). **(B)** NAD kinase (NADK) protein levels were quantified in Western blots and referred to GAPDH expression. **(C)** NADP levels (n = 5) were quantified using reversed-phase HPLC (see *Materials and Methods*) **(D,E)** SIRT1 protein and global lysine acetylation was measured by Western blot analyses. Data represent means  $\pm$  SEM. For Western blots one representative blot is shown. Significance levels were calculated by one way analysis of variance followed by Bonferroni post hoc test.
